# Supplementary material for: History for some or lesson for all? A systematic review and meta-analysis on the immediate and long-term mental health impact of the 2002–2003 Severe Acute Respiratory Syndrome (SARS) outbreak
Source: Springer Nature journal article supplement (doi:10.1186/s12889-021-10701-3), 2021-04-07
Supplement: MOESM1 [file 19043598]

## Additional file 1: Full search terms and search history

### Index

| <u>Page no.</u> | <u>Database</u>                                              |
|-----------------|--------------------------------------------------------------|
| p2 - p3         | Pubmed                                                       |
| p4- p5          | Medline                                                      |
| p6              | Embase                                                       |
| p7              | PsycInfo                                                     |
| p8              | Web of Science Core Collection                               |
| p9              | HKU Scholar Hub                                              |
| p10             | ProQuest CUHK                                                |
| p11             | The Hong Kong College of Psychiatrists Dissertation database |
| p12             | CNKI (Master)                                                |
| p13             | CNKI (Doctoral)                                              |
| p14             | Digital Dissertation Consortium                              |
| p15             | NDLTDTaiwan                                                  |
| p16             | NCLTaiwan                                                    |
| p17             | Airiti Library                                               |
| p18             | NUS database                                                 |
| p19             | Thesis Canada                                                |

| Search ID | Search term 1                                                                                                                                                                                                                                             | AND/OR | Search term 2                                                                                                                                                                                                                                                                                                                              | Filters                 | Search date | Number of result |
|-----------|-----------------------------------------------------------------------------------------------------------------------------------------------------------------------------------------------------------------------------------------------------------|--------|--------------------------------------------------------------------------------------------------------------------------------------------------------------------------------------------------------------------------------------------------------------------------------------------------------------------------------------------|-------------------------|-------------|------------------|
| pubmed_01 | ((severe acute respiratory syndrome[MeSH Terms]) OR (SARS[Title/Abstract]) OR (Respiratory Syndrome, Acute, Severe[Title/Abstract]) OR (Respiratory Syndrome, Severe Acute[Title/Abstract]))                                                              | AND    | ((Psychological Distress[MeSH Terms]) OR (Psychological stress[Title/Abstract]) OR (Psychological effect [Title/Abstract]) OR (Emotional effect [Title/Abstract]) OR (Emotional distress[Title/Abstract]) OR (Emotional stress[Title/Abstract]) OR (Psychological impact[Title/Abstract]) OR (Emotional                                    | Human, English, Chinese | 4/5/2020    | 34               |
| pubmed_02 | ((severe acute respiratory syndrome[MeSH Terms]) OR (SARS[Title/Abstract]) OR (Respiratory Syndrome, Acute, Severe[Title/Abstract]) OR (Respiratory Syndrome, Severe Acute[Title/Abstract]) NOT (covid[Title/Abstract]) NOT(SARS-COV-2 [Title/Abstract])) | AND    | ((Mental Disorders [MeSH]) OR (Psychophysiologic Disorders [MeSH]) OR (Mental Disorders[Title/Abstract]) OR (Psychiatric Disorders [Title/Abstract]) OR (Psychiatric Diagnosis [Title/Abstract]) OR (Psychiatric Diagnoses [Title/Abstract]) OR (Psychophysiological Disorder* [Title/Abstract]) OR (Psychosomatic                         | Human, English, Chinese | 7/5/2020    | 120              |
| pubmed_03 | ((severe acute respiratory syndrome[MeSH Terms]) OR (SARS[Title/Abstract]) OR (Respiratory Syndrome, Acute, Severe[Title/Abstract]) OR (Respiratory Syndrome, Severe Acute[Title/Abstract]))                                                              | AND    | ((Mental Health [MeSH]) OR (Quality of Life[MeSH]) OR (social stigma[MeSH]) OR (Mental Health [Title/Abstract]) OR (Mental Well-being[Title/Abstract]) OR (Mental Wellness[Title/Abstract]) OR (Quality of Life[Title/Abstract]) OR (stigm* [Title/Abstract] ) )                                                                           | Human, English, Chinese | 4/5/2020    | 84               |
| pubmed_04 | ((severe acute respiratory syndrome[MeSH Terms]) OR (SARS[Title/Abstract]) OR (Respiratory Syndrome, Acute, Severe[Title/Abstract]) OR (Respiratory Syndrome, Severe Acute[Title/Abstract]))                                                              | AND    | ((Depression[MeSH]) OR (Depression [Title/Abstract]) OR (Depressive Symptoms[Title/Abstract]) OR (Depressive Disorder[MeSH]) OR (Depressive Disorder[Title/Abstract]) OR (Depress* [Title/Abstract]) OR (Mood Disorders[MeSH]) OR (Mood Disorders[Title/Abstract]) OR (Affective Disorders[Title/Abstract]) OR (Bipolar [Title/Abstract])) | Human, English, Chinese | 5/5/2020    | 57               |
| pubmed_05 | ((severe acute respiratory syndrome[MeSH Terms]) OR (SARS[Title/Abstract]) OR (Respiratory Syndrome, Acute, Severe[Title/Abstract]) OR (Respiratory Syndrome, Severe Acute[Title/Abstract]) NOT (covid[Title/Abstract]) NOT(SARS-COV-2 [Title/Abstract])) | AND    | (Anxiety Disorders [MeSH]) OR (Anxiety[MeSH]) OR (Anxiety Disorders [Title/Abstract]) OR (Anxiety[Title/Abstract]) OR (phobi* [Title/Abstract]) OR (agoraphobi* [Title/Abstract]) OR (panic [Title/Abstract])                                                                                                                              | Human, English, Chinese | 7/5/2020    | 91               |
| pubmed_06 | ((severe acute respiratory syndrome[MeSH Terms]) OR (SARS[Title/Abstract]) OR (Respiratory Syndrome, Acute, Severe[Title/Abstract]) OR (Respiratory Syndrome, Severe Acute[Title/Abstract]))                                                              | AND    | (Stress Disorders, Post-Traumatic [MeSH]) OR (Stress Disorders, Post-Traumatic [Title/Abstract]) OR (Stress Disorder, Post Traumatic [Title/Abstract]) OR (Post-Traumatic Stress Disorder [Title/Abstract]) OR (Posttraumatic Stress Disorder [Title/Abstract]) OR (PTSD [Title/Abstract])                                                 | Human, English, Chinese | 4/5/2020    | 30               |
| pubmed_07 | ((severe acute respiratory syndrome[MeSH Terms]) OR (SARS[Title/Abstract]) OR (Respiratory Syndrome, Acute, Severe[Title/Abstract]) OR (Respiratory Syndrome, Severe Acute[Title/Abstract]))                                                              | AND    | (Sleep Initiation and Maintenance Disorders [MeSH]) OR (Sleep [MeSH]) OR (Insomnia [Title/Abstract]) OR (Sleep Disorders [MeSH]) OR (Sleep Disorders [Title/Abstract]) OR (Sleep Disturbance[Title/Abstract])                                                                                                                              | Human, English, Chinese | 4/5/2020    | 13               |
| pubmed_08 | ((severe acute respiratory syndrome[MeSH Terms]) OR (SARS[Title/Abstract]) OR (Respiratory Syndrome, Acute, Severe[Title/Abstract]) OR (Respiratory Syndrome, Severe Acute[Title/Abstract]))                                                              | AND    | (Substance-Related Disorders [MeSH]) (Alcoholism [MeSH]) OR (Substance Abuse [Title/abstract]) OR (Substance Use Disorders [Title/abstract]) OR (Drug Abuse [Title/abstract]) OR (Alcoholism [Title/abstract]) OR (Alcohol abuse [Title/abstract]) OR (Alcohol [Title/abstract])                                                           | Human, English, Chinese | 6/5/2020    | 20               |

|           |                                                                                                                                                                                                                                                            |     |                                                                                                                                                                                                                                                                                                                                                                                                                                                                                                                                                                                                                                                                                                                        |                         |          |      |
|-----------|------------------------------------------------------------------------------------------------------------------------------------------------------------------------------------------------------------------------------------------------------------|-----|------------------------------------------------------------------------------------------------------------------------------------------------------------------------------------------------------------------------------------------------------------------------------------------------------------------------------------------------------------------------------------------------------------------------------------------------------------------------------------------------------------------------------------------------------------------------------------------------------------------------------------------------------------------------------------------------------------------------|-------------------------|----------|------|
| pubmed_09 | ((severe acute respiratory syndrome[MeSH Terms]) OR (SARS[Title/Abstract]) OR (Respiratory Syndrome, Acute, Severe[Title/Abstract]) OR (Respiratory Syndrome, Severe Acute[Title/Abstract]))                                                               | AND | (Suicide [MeSH]) OR (Suicide, Attempted [MeSH]) OR (Suicide, Completed [MeSH]) OR (Suicide [Title/Abstract]) OR (Suicide Attempt [Title/Abstract]) OR (Suicidal Idea [Title/Abstract]) OR (Suicidality [Title/Abstract]) OR (Suicidal Ideation [Title/Abstract]) OR (Self-harm [Title/Abstract])                                                                                                                                                                                                                                                                                                                                                                                                                       | Human, English, Chinese | 5/5/2020 | 13   |
| pubmed_10 | ((severe acute respiratory syndrome[MeSH Terms]) OR (SARS[Title/Abstract]) OR (Respiratory Syndrome, Acute, Severe[Title/Abstract]) OR (Respiratory Syndrome, Severe Acute[Title/Abstract]) NOT (covid[Title/Abstract]) NOT (SARS-COV-2 [Title/Abstract])) | AND | (Health Personnel [MeSH]) OR (Allied Health Personnel [MeSH]) OR (Health Personnel [Title/Abstract]) OR (Allied Health Personnel [Title/Abstract]) OR (Health Workers [Title/Abstract]) OR (Healthcare Workers [Title/Abstract]) OR (Health Care Workers [Title/Abstract]) OR (Healthcare Assistants [Title/Abstract]) OR (Health Care Assistants [Title/Abstract]) OR (Hospital Workers [Title/Abstract]) OR (Hospital Employees [Title/Abstract]) OR (Hospital Staff [Title/Abstract]) OR (Healthcare Professionals [Title/Abstract]) OR (Health Care Professionals [Title/Abstract]) OR (Healthcare Providers [Title/Abstract]) OR (Health Care Providers [Title/Abstract]) OR (Frontline Workers [Title/Abstract]) | Human, English, Chinese | 7/5/2020 | 713  |
| pubmed_11 | ((severe acute respiratory syndrome[MeSH Terms]) OR (SARS[Title/Abstract]) OR (Respiratory Syndrome, Acute, Severe[Title/Abstract]) OR (Respiratory Syndrome, Severe Acute[Title/Abstract]))                                                               |     | (Mentally-ill[Title/Abstract]) OR (Mental Patients[Title/Abstract]) OR (Psychiatric Patients[Title/Abstract])                                                                                                                                                                                                                                                                                                                                                                                                                                                                                                                                                                                                          | Human, English, Chinese | 5/5/2020 | 0    |
| pubmed_12 | ((severe acute respiratory syndrome[MeSH Terms]) OR (SARS[Title/Abstract]) OR (Respiratory Syndrome, Acute, Severe[Title/Abstract]) OR (Respiratory Syndrome, Severe Acute[Title/Abstract]) NOT (covid[Title/Abstract]) NOT (SARS-COV-2 [Title/Abstract])) | AND | ((Psychosis [MeSH]) OR (psychosis [Title/Abstract]) OR (psychotic [Title/Abstract]) OR (schizo* [Title/Abstract]) OR (delusion* [Title/Abstract]) )                                                                                                                                                                                                                                                                                                                                                                                                                                                                                                                                                                    | Human, English, Chinese | 7/5/2020 | 12   |
|           |                                                                                                                                                                                                                                                            |     |                                                                                                                                                                                                                                                                                                                                                                                                                                                                                                                                                                                                                                                                                                                        |                         | Total    | 1187 |

| Search ID | Search term 1                                                                                                            | AND/OR | Search term 2                                                                                                                                                                                                                                                                                 | Filters                         | Search date | Number of result |
|-----------|--------------------------------------------------------------------------------------------------------------------------|--------|-----------------------------------------------------------------------------------------------------------------------------------------------------------------------------------------------------------------------------------------------------------------------------------------------|---------------------------------|-------------|------------------|
| ovid_01   | exp *SevereAcuteRespiratory Syndrome/ or ((SARS or SevereAcuteRespiratory Syndrome) not covid* not SARS-Cov-2).ab,kw,ti. | AND    | exp *Stress, Psychological/ or exp *Psychological Distress/ OR (Psychological distress or Psychological stress or Emotional distress or Emotional stress or Psychological impact or Emotional impact or Psychological consequence).ab,kw,ti.                                                  | Humans and (Chinese or English) | 4/5/2020    | 57               |
| ovid_02   | exp *SevereAcuteRespiratory Syndrome/ or ((SARS or SevereAcuteRespiratory Syndrome) not covid* not SARS-Cov-2).ab,kw,ti. | AND    | exp *Mental Disorders/ OR exp *Psychophysiological Disorders/ OR (Mental Disorders or Psychiatric Disorders or Psychiatric Diagnosis or Psychophysiological Disorders or Psychosomatic Disorders or Mental Morbidities or Mental illness or Neurocognit* or neuropsychi* or cognit*)ab,kw,ti. | Humans and (Chinese or English) | 7/5/2020    | 95               |
| ovid_03   | exp *SevereAcuteRespiratory Syndrome/ or ((SARS or SevereAcuteRespiratory Syndrome) not covid* not SARS-Cov-2).ab,kw,ti. | AND    | exp *Mental Health/ or exp *Quality of Life/ or exp *Social Stigma/ OR (Mental Health OR Quality of Life OR stigm* OR Mental Well-being OR Mental Wellness OR mental health consequences).ab,kw,ti                                                                                            | Humans and (Chinese or English) | 7/5/2020    | 81               |
| ovid_04   | exp *SevereAcuteRespiratory Syndrome/ or ((SARS or SevereAcuteRespiratory Syndrome) not covid* not SARS-Cov-2).ab,kw,ti. | AND    | (Mentally-ill OR Mental Patients OR Psychiatric Patients).ab,kw,ti.                                                                                                                                                                                                                           | Humans and (Chinese or English) | 7/5/2020    | 0                |
| ovid_05   | exp *SevereAcuteRespiratory Syndrome/ or ((SARS or SevereAcuteRespiratory Syndrome) not covid* not SARS-Cov-2).ab,kw,ti. | OR     | exp *Depression/ or exp *Depressive Disorder/ or exp *Mood Disorders/ or (Depression or Depressive symptoms or Depressive Disorder or Depress* or Mood Disorder* or Affective Disorder* or Bipolar).ab,kw,ti.                                                                                 | Humans and (Chinese or English) | 7/5/2020    | 61               |
| ovid_06   | exp *SevereAcuteRespiratory Syndrome/ or ((SARS or SevereAcuteRespiratory Syndrome) not covid* not SARS-Cov-2).ab,kw,ti. | AND    | exp *Anxiety Disorders / or exp *Anxiety/ or (Anxiety or Anxiety Disorders Or Phobia OR agoraphobi* OR Panic).ab,kw,ti.                                                                                                                                                                       | Humans and (Chinese or English) | 7/5/2020    | 37               |

|         |                                                                                                                              |                                                                                                                                                                                                                                                                                                                                                                                                                        |                                 |          |      |
|---------|------------------------------------------------------------------------------------------------------------------------------|------------------------------------------------------------------------------------------------------------------------------------------------------------------------------------------------------------------------------------------------------------------------------------------------------------------------------------------------------------------------------------------------------------------------|---------------------------------|----------|------|
| ovid_07 | exp *SevereAcuteRespiratory Syndrome/ or AND ((SARS or SevereAcuteRespiratory Syndrome) not covid* not SARS-Cov-2).ab,kw,ti. | exp *Stress Disorders, Post-Traumatic / or (Stress Disorders, Post-Traumatic OR Post-Traumatic Stress Disorder OR Posttraumatic Stress Disorder OR PTSD).ab,kw,ti.                                                                                                                                                                                                                                                     | Humans and (Chinese or English) | 7/5/2020 | 25   |
| ovid_08 | exp *SevereAcuteRespiratory Syndrome/ or AND ((SARS or SevereAcuteRespiratory Syndrome) not covid* not SARS-Cov-2).ab,kw,ti. | exp *Sleep Initiation and Maintenance Disorders" / or exp *Sleep / or exp *Sleep Disorders / or (Insomnia or Sleep Disorder* or Sleep Disturbance).ab,kw,ti.                                                                                                                                                                                                                                                           | Humans and (Chinese or English) | 7/5/2020 | 7    |
| ovid_09 | exp *SevereAcuteRespiratory Syndrome/ or AND ((SARS or SevereAcuteRespiratory Syndrome) not covid* not SARS-Cov-2).ab,kw,ti. | exp *Substance-Related Disorders / or exp *Alcoholism / or (Substance Abuse or Drug Abuse or Alcoholism or Alcohol abuse or Alcohol*).ab,kw,ti.                                                                                                                                                                                                                                                                        | Humans and (Chinese or English) | 7/5/2020 | 22   |
| ovid_10 | exp *SevereAcuteRespiratory Syndrome/ or AND ((SARS or SevereAcuteRespiratory Syndrome) not covid* not SARS-Cov-2).ab,kw,ti. | exp *Suicide / or exp *Suicide, Attempted / or exp *Suicide, Completed / or (Suicide or Suicidal Attempt or Suicidal Idea or Suicidality or Suicidal Ideation or Self-harm or Self harm ).ab,kw,ti.                                                                                                                                                                                                                    | Humans and (Chinese or English) | 7/5/2020 | 11   |
| ovid_11 | exp *SevereAcuteRespiratory Syndrome/ or AND ((SARS or SevereAcuteRespiratory Syndrome) not covid* not SARS-Cov-2).ab,kw,ti. | exp *Health Personnel / or exp *Allied Health Personnel / or (Health Workers OR Healthcare Workers OR Health Care Workers OR Healthcare Assistants OR Health Care Assistants OR Hospital Workers OR Hospital Employees OR Hospital Staff OR Health care Professionals OR Health Care Professionals OR Healthcare Providers OR Health Care Providers OR Frontline Workers OR Doctors OR Physicians OR Nurses).ab,kw,ti. | Humans and (Chinese or English) | 7/5/2020 | 640  |
| ovid_12 | exp *SevereAcuteRespiratory Syndrome/ or AND ((SARS or SevereAcuteRespiratory Syndrome) not covid* not SARS-Cov-2).ab,kw,ti. | exp *psychosis/ or (psychosis OR Psychotic or schizo* or delusion*).ab,kw,ti                                                                                                                                                                                                                                                                                                                                           | Humans and (Chinese or English) | 7/5/2020 | 13   |
| Total   |                                                                                                                              |                                                                                                                                                                                                                                                                                                                                                                                                                        |                                 |          | 1049 |

| Search ID | Search term 1                                                                                                           | AND/OR | Search term 2                                                                                                                                                                                                                                                                                                                                                                                                    | Filters                         | Search date | Number of result |
|-----------|-------------------------------------------------------------------------------------------------------------------------|--------|------------------------------------------------------------------------------------------------------------------------------------------------------------------------------------------------------------------------------------------------------------------------------------------------------------------------------------------------------------------------------------------------------------------|---------------------------------|-------------|------------------|
| Embase_01 | exp *SevereAcuteRespiratorySyndrome/ or ((SARS or Severe AcuteRespiratorySyndrome) not covid* not SARS-Cov-2).ab,kw,ti. | AND    | exp *Stress, Psychological/ or exp *Psychological Distress/ OR ( Psychological distress or Psychological stress or Emotional distress or Emotional stress or Psychological impact or Emotional impact or Psychological consequence*).ab,kw,ti.                                                                                                                                                                   | Humans and (Chinese or English) | 7/5/2020    | 65               |
| Embase_02 | exp *SevereAcuteRespiratorySyndrome/ or ((SARS or Severe AcuteRespiratorySyndrome) not covid* not SARS-Cov-2).ab,kw,ti. | AND    | exp *Mental Disorders/ OR exp *Psychophysiologic Disorders/ OR exp *cognitive deficit/ or (Mental Disorders or Psychiatric Disorders or Psychiatric Diagnosis or Psychophysiological Disorders or Psychosomatic Disorders or Mental Morbidities or Mental illness or Neurocognit* or neuropsychi*).ab,kw,ti.                                                                                                     | Humans and (Chinese or English) | 7/5/2020    | 134              |
| Embase_03 | exp *SevereAcuteRespiratorySyndrome/ or ((SARS or Severe AcuteRespiratorySyndrome) not covid* not SARS-Cov-2).ab,kw,ti. | AND    | exp *Mental Health/ or exp *Quality of Life/ or exp *Social Stigma/ OR ( Mental Health OR Quality of Life OR stigm* OR Mental Well-being OR Mental Wellness OR mental health consequences).ab,kw,ti                                                                                                                                                                                                              | Humans and (Chinese or English) | 7/5/2020    | 148              |
| Embase_04 | exp *SevereAcuteRespiratorySyndrome/ or ((SARS or Severe AcuteRespiratorySyndrome) not covid* not SARS-Cov-2).ab,kw,ti. | AND    | (Mentally-ill OR Mental Patients OR Psychiatric Patients).ab,kw,ti.                                                                                                                                                                                                                                                                                                                                              | Humans and (Chinese or English) | 7/5/2020    | 0                |
| Embase_05 | exp *SevereAcuteRespiratorySyndrome/ or ((SARS or Severe AcuteRespiratorySyndrome) not covid* not SARS-Cov-2).ab,kw,ti. | AND    | exp *Depression/ or exp *Depressive Disorder/ or exp *Mood Disorders/ or (Depression or Depressive symptoms or Depressive Disorder or Depress* or Mood Disorder* or Affective Disorder* or Bipolar).ab,kw,ti.                                                                                                                                                                                                    | Humans and (Chinese or English) | 7/5/2020    | 91               |
| Embase_06 | exp *SevereAcuteRespiratorySyndrome/ or ((SARS or Severe AcuteRespiratorySyndrome) not covid* not SARS-Cov-2).ab,kw,ti. | AND    | exp *Anxiety Disorders/ or exp *Anxiety/ or (Anxiety or Anxiety Disorders Or Phobia OR agoraphobi* OR Panic).ab,kw,ti.                                                                                                                                                                                                                                                                                           | Humans and (Chinese or English) | 7/5/2020    | 79               |
| Embase_07 | exp *SevereAcuteRespiratorySyndrome/ or ((SARS or Severe AcuteRespiratorySyndrome) not covid* not SARS-Cov-2).ab,kw,ti. | AND    | exp *Stress Disorders, Post-Traumatic/ or (Stress Disorders, Post-Traumatic OR Post-Traumatic Stress Disorder OR Posttraumatic Stress Disorder OR PTSD).ab,kw,ti.                                                                                                                                                                                                                                                | Humans and (Chinese or English) | 7/5/2020    | 28               |
| Embase_08 | exp *SevereAcuteRespiratorySyndrome/ or ((SARS or Severe AcuteRespiratorySyndrome) not covid* not SARS-Cov-2).ab,kw,ti. | AND    | exp **Sleep Initiation and Maintenance Disorders*/ or exp *Sleep / or exp *Sleep Disorders/ or (Insomnia or Sleep Disorder* or Sleep Disturbance).ab,kw,ti.                                                                                                                                                                                                                                                      | Humans and (Chinese or English) | 7/5/2020    | 8                |
| Embase_09 | exp *SevereAcuteRespiratorySyndrome/ or ((SARS or Severe AcuteRespiratorySyndrome) not covid* not SARS-Cov-2).ab,kw,ti. | AND    | exp *Substance-Related Disorders / or exp *Alcoholism / or (Substance Abuse or Drug Abuse or Alcoholism or Alcohol abuse or Alcohol*).ab,kw,ti.                                                                                                                                                                                                                                                                  | Humans and (Chinese or English) | 7/5/2020    | 25               |
| Embase_10 | exp *SevereAcuteRespiratorySyndrome/ or ((SARS or Severe AcuteRespiratorySyndrome) not covid* not SARS-Cov-2).ab,kw,ti. | AND    | exp *Suicide / or exp *Suicide, Attempted / or exp *Suicide, Completed / or (Suicide or Suicidal Attempt* or Suicidal Ideas* or Suicidal* or Self-harm or Self harm).ab,kw,ti.                                                                                                                                                                                                                                   | Humans and (Chinese or English) | 7/5/2020    | 11               |
| Embase_11 | exp *SevereAcuteRespiratorySyndrome/ or ((SARS or Severe AcuteRespiratorySyndrome) not covid* not SARS-Cov-2).ab,kw,ti. | AND    | exp *Health Personnel/ or exp *Allied Health Personnel/ or (Health Workers OR Healthcare Workers OR Health Care Workers OR Healthcare Assistants OR Health Care Assistants OR Hospital Workers OR Hospital Employees OR Hospital Staff OR Healthcare Professionals OR Health Care Professionals Healthcare Providers OR Health Care Providers OR Frontline Workers OR Doctors OR Physicians OR Nurses).ab,kw,ti. | Humans and (Chinese or English) | 7/5/2020    | 755              |
| Embase_12 | exp *SevereAcuteRespiratorySyndrome/ or ((SARS or Severe AcuteRespiratorySyndrome) not covid* not SARS-Cov-2).ab,kw,ti. | AND    | exp *psychosis/ or (psychosis OR Psychotic or schizo* or delusion*).ab,kw,ti                                                                                                                                                                                                                                                                                                                                     | Humans and (Chinese or English) | 7/5/2020    | 29               |
|           |                                                                                                                         |        |                                                                                                                                                                                                                                                                                                                                                                                                                  |                                 | Total       | 1373             |

| Search ID   | Search term 1                                                                                                                           | AND/OR | Search term 2 | Filters                         | Search date | Number of result |
|-------------|-----------------------------------------------------------------------------------------------------------------------------------------|--------|---------------|---------------------------------|-------------|------------------|
| psycinfo_01 | ((SARS or "Severe Acute Respiratory Syndrome") not covid not "2019 novel coronavirus" not "SARS-CoV-2" not "2019-nCoV").ab,ti,hw,id,mh. |        |               | Humans and (Chinese or English) | 6/5/2020    | 457              |
| Total:      |                                                                                                                                         |        |               |                                 |             | 457              |

| Search ID | Search term 1                                                                                                                    | AND/OR | Search term 2                                                                                                                                                                                                                                    | Filters                         | Search date | Number of result |
|-----------|----------------------------------------------------------------------------------------------------------------------------------|--------|--------------------------------------------------------------------------------------------------------------------------------------------------------------------------------------------------------------------------------------------------|---------------------------------|-------------|------------------|
| WOS_01    | TS=(SARS or "severeacuterespiratorysyndrome") NOTTS=covid NOTTS="2019<br>novel coronavirus"                                      | AND    | TS=( "Psychological distress" OR "emotional<br>distress" OR "Psychological stress" OR "emotional distress"                                                                                                                                       | English, Chinese                | 6/5/2020    | 92               |
| WOS_02    | TS=(SARS or "severeacuterespiratorysyndrome") NOTTS=covid NOTTS="2019<br>novel coronavirus"                                      | AND    | TS=( "Mental Disorder" OR "Psychiatric Disorder" OR<br>"Psychiatric Diagnosis" OR "Psychiatric Diagnoses" OR                                                                                                                                     | English, Chinese                | 6/5/2020    | 181              |
| WOS_03    | TS=(SARS or "severeacuterespiratorysyndrome") NOTTS=covid NOTTS="2019<br>novel coronavirus"                                      | AND    | TS=( "Mental Health" OR "Mental Well-being" OR "Mental<br>Wellness" OR "Quality of life" OR "Mental health                                                                                                                                       | English, Chinese                | 6/5/2020    | 141              |
| WOS_04    | TS=(SARS or "severeacuterespiratorysyndrome") NOTTS=covid NOTTS="2019<br>novel coronavirus"                                      | AND    | TS=( Mentally-ill OR Mental Patients OR Psychiatric Patients)                                                                                                                                                                                    | English, Chinese                | 6/5/2020    | 99               |
| WOS_05    | TS=(SARS or "severeacuterespiratorysyndrome") NOTTS=covid NOTTS="2019<br>novel coronavirus"                                      | AND    | TS=(Psychosis or Psychotic or schizo* or delusion*)                                                                                                                                                                                              | English, Chinese                | 6/5/2020    | 64               |
| WOS_06    | TS=(SARS or "severeacuterespiratorysyndrome") NOTTS=covid NOTTS="2019<br>novel coronavirus"                                      | AND    | TS=(Neuropsych* OR neurocog* OR cognitive)                                                                                                                                                                                                       | English, Chinese                | 6/5/2020    | 64               |
| WOS_07    | TS=(SARS or "severeacuterespiratorysyndrome") NOTTS=covid NOTTS="2019<br>novel coronavirus"                                      | AND    | TS=( Depress* or "Mood Disorder" OR "Affective Disorder"<br>or Bipolar)                                                                                                                                                                          | English, Chinese                | 6/5/2020    | 108              |
| WOS_08    | TS=(SARS or "severeacuterespiratorysyndrome") NOTTS=covid NOTTS="2019<br>novel coronavirus"                                      | AND    | TS=(Anxiety OR Phobia OR *phobia OR Panic)                                                                                                                                                                                                       | Humans and (Chinese or English) | 6/5/2020    | 35               |
| WOS_09    | TS=(SARS or "severeacuterespiratorysyndrome") NOTTS=covid NOTTS="2019<br>novel coronavirus"                                      | AND    | TS=( "Stress Disorders" or "Stress-related disorders" OR<br>"acutestress reaction" or "acutestress disorder" OR "Post-                                                                                                                           | Humans and (Chinese or English) | 6/5/2020    | 44               |
| WOS_10    | TS=(SARS or "severeacuterespiratorysyndrome") NOTTS=covid NOTTS="2019<br>novel coronavirus"                                      | AND    | TS=(Insomnia or "Sleep Disorder" OR "Sleep Disturbance" or<br>"Sleep quality" )                                                                                                                                                                  | Humans and (Chinese or English) | 6/5/2020    | 7                |
| WOS_11    | TS=(SARS or "severeacuterespiratorysyndrome") NOTTS=covid NOTTS="2019<br>novel coronavirus"                                      | AND    | TS=( "Substance-Related Disorder*" OR "SubstanceAbuse" or<br>"Substance use disorder" OR "Drug Abuse" or Alcoholi* or                                                                                                                            | Humans and (Chinese or English) | 6/5/2020    | 5                |
| WOS_12    | TS=(SARS or "severeacuterespiratorysyndrome") NOTTS=covid NOTTS="2019<br>novel coronavirus"                                      | AND    | TS=( Suicide or "Suicidal Attempt" OR "Suicidal Idea" or<br>Suicidal* or "Suicidal or Self-harm or 'Self harm')                                                                                                                                  | Humans and (Chinese or English) | 6/5/2020    | 22               |
| WOS_13    | TS=(SARS or "severeacuterespiratorysyndrome") NOTTS=covid NOTTS="2019<br>novel coronavirus" NOTTS="SARS-CoV-2" NOTTS="2019-nCoV" | AND    | TS=( "Health Workers" OR "HealthcareWorkers" OR "Health<br>Care Workers" OR "Healthcare Assistants" OR "Health Care<br>Assistants" OR "Hospital Workers" OR "Hospital Employees"<br>OR "Hospital Staff" OR "Healthcare Professionals" OR "Health | Humans and (Chinese or English) | 6/5/2020    | 867              |
| Total:    |                                                                                                                                  |        |                                                                                                                                                                                                                                                  |                                 |             | 1729             |



| Search ID | Search term 1                                                                                                                                                                                                                   | AND/OR | Search term 2                                                                                                                                                                                                            | Search date | Number of result |
|-----------|---------------------------------------------------------------------------------------------------------------------------------------------------------------------------------------------------------------------------------|--------|--------------------------------------------------------------------------------------------------------------------------------------------------------------------------------------------------------------------------|-------------|------------------|
| hku_01    | ((title:SARS) OR (title:Respiratory syndrome, severe, acute)) OR (abstract:SARS) OR (abstract:Respiratory syndrome, severe, acute) OR (title:severe acute respiratory syndrome) OR (abstract:severe acute respiratory syndrome) | AND    | (title:mental OR psychological OR emotional) OR (abstract:mental OR psychological OR emotional) OR (title:psychiatric OR mental health OR quality of life) OR (abstract:psychiatric OR mental health OR quality of life) | 10/6/2020   | 16               |
| hku_02    | ((title:SARS) OR (title:Respiratory syndrome, severe, acute)) OR (abstract:SARS) OR (abstract:Respiratory syndrome, severe, acute) OR (title:severe acute respiratory syndrome) OR (abstract:severe acute respiratory syndrome) | AND    | (title:mental well-being OR stigma) OR (abstract:mental well-being OR stigma)                                                                                                                                            | 10/6/2020   | 0                |
| hku_03    | ((title:SARS) OR (title:Respiratory syndrome, severe, acute)) OR (abstract:SARS) OR (abstract:Respiratory syndrome, severe, acute) OR (title:severe acute respiratory syndrome) OR (abstract:severe acute respiratory syndrome) | AND    | (title:(depression OR mood disorder OR bipolar )) OR (abstract:(depression OR mood disorder OR bipolar ))                                                                                                                | 10/6/2020   | 16               |
| hku_04    | ((title:SARS) OR (title:Respiratory syndrome, severe, acute)) OR (abstract:SARS) OR (abstract:Respiratory syndrome, severe, acute) OR (title:severe acute respiratory syndrome) OR (abstract:severe acute respiratory syndrome) | AND    | (title:(Anxiety OR Stress OR PTSD OR Post traumatic)) OR (abstract:(Anxiety OR Stress OR PTSD OR Post traumatic))                                                                                                        | 10/6/2020   | 20               |
| hku_05    | ((title:SARS) OR (title:Respiratory syndrome, severe, acute)) OR (abstract:SARS) OR (abstract:Respiratory syndrome, severe, acute) OR (title:severe acute respiratory syndrome) OR (abstract:severe acute respiratory syndrome) | AND    | (title:(sleep OR insomnia)) OR (abstract:(sleep OR insomnia))                                                                                                                                                            | 10/6/2020   | 31               |
| hku_06    | ((title:SARS) OR (title:Respiratory syndrome, severe, acute)) OR (abstract:SARS) OR (abstract:Respiratory syndrome, severe, acute) OR (title:severe acute respiratory syndrome) OR (abstract:severe acute respiratory syndrome) | AND    | (title:(healthcare workers OR doctors OR nurses)) OR (abstract:(healthcare workers OR doctors OR nurses))                                                                                                                | 10/6/2020   | 31               |
|           |                                                                                                                                                                                                                                 |        |                                                                                                                                                                                                                          | Total       | 114              |

| Search ID | Search term 1                                                                                                                                                                                 | AND/OR | Search term 2 | Search date | Number of result |
|-----------|-----------------------------------------------------------------------------------------------------------------------------------------------------------------------------------------------|--------|---------------|-------------|------------------|
| cu_01     | t(SARS) OR ti(Severe Acute Respiratory Syndrome) OR ti(Severe, Acute, Respiratory, Syndrome) OR ab(SARS) OR ab(Severe Acute Respiratory Syndrome) OR ab(Severe, Acute, Respiratory, Syndrome) |        |               | 10/6/2020   | 16               |

|       |    |
|-------|----|
| Total | 16 |
|-------|----|

| Search ID  | Search term 1                            | AND/OR | Search term 2 | Search date | Number of result |
|------------|------------------------------------------|--------|---------------|-------------|------------------|
| hkpsych_01 | <b>SARS</b>                              |        |               | 10/6/2020   | 1                |
| hkpsych_02 | <b>Severe Acute Respiratory Syndrome</b> |        |               | 10/6/2020   | 1                |
|            |                                          |        | Total         |             | 2                |

| Search ID | Search term 1                                                                                                                                                        | AND/OR | Search term 2                                                                                                                                | Search date | Number of |
|-----------|----------------------------------------------------------------------------------------------------------------------------------------------------------------------|--------|----------------------------------------------------------------------------------------------------------------------------------------------|-------------|-----------|
| cmt_01    | (TI=(SARS+'Severe Acute Respiratory Syndrome'+ <b>非典型肺炎</b> + <b>严重急性呼吸综合症</b> ) OR AB=(SARS+'Severe Acute Respiratory Syndrome'+ <b>非典型肺炎</b> + <b>严重急性呼吸综合症</b> )) | AND    | (TI=(Mental+'Psychological'+Emotional+'心理'+ <b>情绪</b> ) OR AB=(Mental+'Psychological'+Emotional+'心理'+ <b>情绪</b> ))                           | 10/6/2020   | 48        |
| cmt_02    | (TI=(SARS+'Severe Acute Respiratory Syndrome'+ <b>非典型肺炎</b> + <b>严重急性呼吸综合症</b> ) OR                                                                                  | AND    | (TI=( <b>焦虑</b> + <b>忧郁</b> + <b>创伤</b> +Anxiety+'Depression'+Posttraumatic) OR                                                              | 10/6/2020   | 33        |
| cmt_03    | (TI=(SARS+'Severe Acute Respiratory Syndrome'+ <b>非典型肺炎</b> + <b>严重急性呼吸综合症</b> ) OR                                                                                  | AND    | (TI=( <b>压力</b> + <b>睡眠</b> + <b>自杀</b> +Stress+'Sleep'+Suicide) OR                                                                          | 10/6/2020   | 127       |
| cmt_04    | (TI=(SARS+'Severe Acute Respiratory Syndrome'+ <b>非典型肺炎</b> + <b>严重急性呼吸综合症</b> ) OR AB=(SARS+'Severe Acute Respiratory Syndrome'+ <b>非典型肺炎</b> + <b>严重急性呼吸综合症</b> )) | AND    | (TI=( <b>医护</b> + <b>护士</b> + <b>医生</b> +Healthcare+'Nurse'+Doctors) OR AB=( <b>医护</b> + <b>护士</b> + <b>医生</b> +Healthcare+'Nurse'+Doctors)) | 10/6/2020   | 62        |
|           |                                                                                                                                                                      |        |                                                                                                                                              | Total       | 270       |

| Search ID    | Search term 1                                                                                                                                                          | AND/OR | Search term 2                                                                                      | Search date | Number of result |
|--------------|------------------------------------------------------------------------------------------------------------------------------------------------------------------------|--------|----------------------------------------------------------------------------------------------------|-------------|------------------|
| cdd_01       | (TI=(SARS+'Severe Acute Respiratory Syndrome'+ <b>非典型肺炎</b> +' <b>严重急性呼吸综合征</b> ) OR AB=(SARS+'Severe Acute Respiratory Syndrome'+ <b>非典型肺炎</b> +' <b>严重急性呼吸综合征</b> )) | AND    | (TI=(Mental+'Psychological'+'Emotional'+心理+'情绪) OR AB=(Mental+'Psychological'+'Emotional'+心理+'情绪)) | 10/6/2020   | 28               |
| cdd_02       | (TI=(SARS+'Severe Acute Respiratory Syndrome'+ <b>非典型肺炎</b> +' <b>严重急性呼吸综合征</b> ) OR AB=(SARS+'Severe Acute Respiratory Syndrome'+ <b>非典型肺炎</b> +' <b>严重急性呼吸综合征</b> )) | AND    | (TI=(焦虑+'忧郁'+'创伤'+Anxiety+'Depression'+Posttraumatic) OR                                           | 10/6/2020   | 19               |
| cdd_03       | (TI=(SARS+'Severe Acute Respiratory Syndrome'+ <b>非典型肺炎</b> +' <b>严重急性呼吸综合征</b> ) OR AB=(SARS+'Severe Acute Respiratory Syndrome'+ <b>非典型肺炎</b> +' <b>严重急性呼吸综合征</b> )) | AND    | (TI=(压力+'睡眠'+自杀+'Stress'+Sleep+'Suicide') OR                                                       | 10/6/2020   | 55               |
| cdd_04       | (TI=(SARS+'Severe Acute Respiratory Syndrome'+ <b>非典型肺炎</b> +' <b>严重急性呼吸综合征</b> ) OR AB=(SARS+'Severe Acute Respiratory Syndrome'+ <b>非典型肺炎</b> +' <b>严重急性呼吸综合征</b> )) | AND    | (TI=(医护+'护士'+医生+'Healthcare'+Nurse+'Doctors') OR AB=(医护+'护士'+医生+'Healthcare'+Nurse+'Doctors'))     | 10/6/2020   | 31               |
| <b>Total</b> |                                                                                                                                                                        |        |                                                                                                    |             | <b>133</b>       |

| Search ID | Search term 1                                                                                                                                                                                                                                   | AND/OR | Search term 2                                                                                                                                                                                                                     | Search date  | Number of result |
|-----------|-------------------------------------------------------------------------------------------------------------------------------------------------------------------------------------------------------------------------------------------------|--------|-----------------------------------------------------------------------------------------------------------------------------------------------------------------------------------------------------------------------------------|--------------|------------------|
| ddc_01    | <b>((title:\$SARS) OR (title:Respiratory syndrome, severe, acute) OR (abstract:\$SARS) OR (abstract:Respiratory syndrome, severe, acute)) OR (title:\$severe acute respiratory syndrome) OR (abstract:\$severe acute respiratory syndrome))</b> | AND    | (title:\$mental OR psychological OR emotional) OR (abstract:\$mental OR psychological OR emotional) OR (title:\$psychiatric OR mental health OR quality of life) OR (abstract:\$psychiatric OR mental health OR quality of life)) | 10/6/2020    | 0                |
| ddc_02    | <b>((title:\$SARS) OR (title:Respiratory syndrome, severe, acute) OR (abstract:\$SARS) OR (abstract:Respiratory syndrome, severe, acute)) OR (title:\$severe acute respiratory syndrome) OR (abstract:\$severe acute respiratory syndrome))</b> | AND    | (title:\$mental well-being OR stigma) OR (abstract:\$mental well-being OR stigma))                                                                                                                                                | 10/6/2020    | 0                |
| ddc_03    | <b>((title:\$SARS) OR (title:Respiratory syndrome, severe, acute) OR (abstract:\$SARS) OR (abstract:Respiratory syndrome, severe, acute)) OR (title:\$severe acute respiratory syndrome) OR (abstract:\$severe acute respiratory syndrome))</b> | AND    | (title:\$psychosis OR depression OR anxiety) OR (abstract:\$psychosis OR depression OR anxiety))                                                                                                                                  | 10/6/2020    | 0                |
| ddc_04    | <b>((title:\$SARS) OR (title:Respiratory syndrome, severe, acute) OR (abstract:\$SARS) OR (abstract:Respiratory syndrome, severe, acute)) OR (title:\$severe acute respiratory syndrome) OR (abstract:\$severe acute respiratory syndrome))</b> | AND    | (title:\$stress OR posttraumatic) OR (abstract:\$stress OR posttraumatic))                                                                                                                                                        | 10/6/2020    | 1                |
| ddc_05    | <b>((title:\$SARS) OR (title:Respiratory syndrome, severe, acute) OR (abstract:\$SARS) OR (abstract:Respiratory syndrome, severe, acute)) OR (title:\$severe acute respiratory syndrome) OR (abstract:\$severe acute respiratory syndrome))</b> | AND    | (title:\$healthcare workers OR doctors OR nurses) OR (abstract:\$healthcare workers OR doctors OR nurses))                                                                                                                        | 10/6/2020    | 7                |
|           |                                                                                                                                                                                                                                                 |        |                                                                                                                                                                                                                                   | <b>Total</b> | <b>8</b>         |



| Search ID | Search term 1                                         | AND/OR | Search term 2                                                 | Search date | Number of result |
|-----------|-------------------------------------------------------|--------|---------------------------------------------------------------|-------------|------------------|
| nd_01     | 嚴重急性呼吸道症候群                                            |        |                                                               | 10/6/2020   | 20               |
| nd_02     | (TI=SARS)[OR] (AB=SARS)[OR] (TI=非典型肺炎)[OR] (AB=非典型肺炎) | AND    | (TI=心理 OR 情緒 OR 焦慮 OR 憂鬱)                                     | 10/6/2020   | 39               |
| nd_03     | (TI=SARS)[OR] (AB=SARS)[OR] (TI=非典型肺炎)[OR] (AB=非典型肺炎) | AND    | OR (AB=心理 OR 情緒 OR 焦慮 OR<br>(TI=壓力 OR 睡眠) OR (AB=壓力 OR<br>睡眠) | 10/6/2020   | 15               |
| nd_04     | (TI=SARS)[OR] (AB=SARS)[OR] (TI=非典型肺炎)[OR] (AB=非典型肺炎) | AND    | (TI=護理 OR 護士 OR 醫生 OR 醫護)<br>OR (AB=護理 OR 護士 OR 醫生 OR         | 10/6/2020   | 53               |
|           |                                                       |        |                                                               | Total       | 127              |



| Search ID | Search term 1                                                                                                                                                                                                                | AND/OR | Search term 2                                                                                                                                                                                                      | Search date | Number of result |
|-----------|------------------------------------------------------------------------------------------------------------------------------------------------------------------------------------------------------------------------------|--------|--------------------------------------------------------------------------------------------------------------------------------------------------------------------------------------------------------------------|-------------|------------------|
| a1_01     | ((title:SARS) OR (title:Respiratory syndrome,severe,acute)) OR (abstract:SARS) OR (abstract:Respiratory syndrome,severe,acute) OR (title:severe acute respiratory syndrome) OR (abstract:severe acute respiratory syndrome)) | AND    | ((title:mental ORpsychological ORemotional)) OR (abstract:mental ORpsychological ORemotional)) OR (title:psychiatric ORmental health ORquality oflife) OR (abstract:psychiatric ORmental health ORquality oflife)) | 13/6/2020   | 29               |
| a1_02     | ((title:SARS) OR (title:Respiratory syndrome,severe,acute)) OR (abstract:SARS) OR (abstract:Respiratory syndrome,severe,acute) OR (title:severe acute respiratory syndrome) OR (abstract:severe acute respiratory syndrome)) | AND    | ((title:mental well-being ORstigma)) OR (abstract:mental well-being ORstigma))                                                                                                                                     | 13/6/2020   | 5                |
| a1_03     | ((title:SARS) OR (title:Respiratory syndrome,severe,acute)) OR (abstract:SARS) OR (abstract:Respiratory syndrome,severe,acute) OR (title:severe acute respiratory syndrome) OR (abstract:severe acute respiratory syndrome)) | AND    | ((title:psychosis ORdepression ORanxiety) OR (abstract:psychosis ORdepression ORanxiety))                                                                                                                          | 13/6/2020   | 3                |
| a1_04     | ((title:SARS) OR (title:Respiratory syndrome,severe,acute)) OR (abstract:SARS) OR (abstract:Respiratory syndrome,severe,acute) OR (title:severe acute respiratory syndrome) OR (abstract:severe acute respiratory syndrome)) | AND    | ((title:stress ORposttraumatic) OR (abstract:stress OR posttraumatic))                                                                                                                                             | 13/6/2020   | 3                |
| a1_05     | ((title:SARS) OR (title:Respiratory syndrome,severe,acute)) OR (abstract:SARS) OR (abstract:Respiratory syndrome,severe,acute) OR (title:severe acute respiratory syndrome) OR (abstract:severe acute respiratory syndrome)) | AND    | ((title:healthcare workers ORdoctors ORnurses) OR (abstract:healthcare workers ORdoctors ORnurses))                                                                                                                | 13/6/2020   | 10               |
|           |                                                                                                                                                                                                                              |        |                                                                                                                                                                                                                    | Total       | 50               |

| Search ID | Search term 1                                                                                                                                                                                                                            | AND/OR | Search term 2                                                                                                                                                                                                                 | Search date | Number of result |
|-----------|------------------------------------------------------------------------------------------------------------------------------------------------------------------------------------------------------------------------------------------|--------|-------------------------------------------------------------------------------------------------------------------------------------------------------------------------------------------------------------------------------|-------------|------------------|
| a1_01     | ((title:\$SARS) OR (title:Respiratory syndrome,severe,acute))OR (abstract:\$SARS) OR<br>(abstract:Respiratory syndrome,severe,acute) OR (title:\$severe acute respiratory syndrome))OR<br>(abstract:\$severe acute respiratory syndrome) | AND    | (title:mental ORpsychological ORemotional))OR<br>(abstract:(mental ORpsychological ORemotional))OR<br>(title:(psychiatric ORmental health ORquality of life))OR<br>(abstract:(psychiatric ORmental health ORquality of life)) | 14/6/2020   | 2                |
| a1_02     | ((title:\$SARS) OR (title:Respiratory syndrome,severe,acute))OR (abstract:\$SARS) OR<br>(abstract:Respiratory syndrome,severe,acute) OR (title:\$severe acute respiratory syndrome))OR                                                   | AND    | (title:(mental well-being ORstigma))OR(abstract:(mental<br>well-being ORstigma))                                                                                                                                              | 14/6/2020   | 0                |
| a1_03     | ((title:\$SARS) OR (title:Respiratory syndrome,severe,acute))OR (abstract:\$SARS) OR<br>(abstract:Respiratory syndrome,severe,acute) OR (title:\$severe acute respiratory syndrome))OR                                                   | AND    | (title:(psychosis ORdepression ORanxiety)OR<br>(abstract:(psychosis ORdepression ORanxiety))                                                                                                                                  | 14/6/2020   | 5                |
| a1_04     | ((title:\$SARS) OR (title:Respiratory syndrome,severe,acute))OR (abstract:\$SARS) OR<br>(abstract:Respiratory syndrome,severe,acute) OR (title:\$severe acute respiratory syndrome))OR<br>(abstract:\$severe acute respiratory syndrome) | AND    | (title:(stress ORposttraumatic)OR(abstract:(stress OR<br>posttraumatic))                                                                                                                                                      | 14/6/2020   | 5                |
| a1_05     | ((title:\$SARS) OR (title:Respiratory syndrome,severe,acute))OR (abstract:\$SARS) OR<br>(abstract:Respiratory syndrome,severe,acute) OR (title:\$severe acute respiratory syndrome))OR                                                   | AND    | (title:(healthcare workers ORdoctors ORnurses)OR<br>(abstract:(healthcare workers ORdoctors ORnurses))                                                                                                                        | 14/6/2020   | 7                |
|           |                                                                                                                                                                                                                                          |        |                                                                                                                                                                                                                               | Total       | 19               |

| Search ID | Search term 1                                              | AND/OR | Search term 2 | Search date  | Number of result |
|-----------|------------------------------------------------------------|--------|---------------|--------------|------------------|
| lac_01    | <b>TIOR AB=(SARS OR Severe Acute Respiratory Syndrome)</b> |        |               |              | 26               |
|           |                                                            |        |               | <b>Total</b> | <b>26</b>        |
