# Supplementary material for: History for some or lesson for all? A systematic review and meta-analysis on the immediate and long-term mental health impact of the 2002–2003 Severe Acute Respiratory Syndrome (SARS) outbreak
Source: Springer Nature journal article supplement (doi:10.1186/s12889-021-10701-3), 2021-04-07
Supplement: MOESM2 [file 19043598]

Additional file 2: List of excluded studies with reasons

| Study Number | Study Name                                                                                                                                                                  | First Author   | Year | Journal                                        | Reason for exclusion                         | Reason code |
|--------------|-----------------------------------------------------------------------------------------------------------------------------------------------------------------------------|----------------|------|------------------------------------------------|----------------------------------------------|-------------|
| 264          | A Longitudinal Research on the Citizens' Subjective Well-being in a Coastal Province                                                                                        | Xing, ZJ       | 2005 | Psychological Science                          | Primary data not SARS related                | 1           |
| 530          | Impact of SARS on avian influenza preparedness in health care workers                                                                                                       | Tam, DK        | 2007 | Infection                                      | Primary data not SARS related                | 1           |
| 1043         | Prevalence and factors associated with social avoidance of recovered SARS patients in the Hong Kong general population                                                      | Lau, JT        | 2006 | Health Education Research                      | Wrong patient population                     | 1           |
| 1087         | Quarantine: A concept to preparedness                                                                                                                                       | Sibyl, S       | 2014 | Research Journal of Pharmaceutical, Biologica  | Primary data not SARS related                | 1           |
| 1117         | Psychological approaches to the relationship between happiness and public policy in P.R. China                                                                              | Shi, K         | 2006 | Happiness and public policy                    | Primary data not SARS related                | 1           |
| 1340         | Fear and stigma: the epidemic with in the SARS outbreak                                                                                                                     | Person, B      | 2004 | Emerg Infect Dis                               | Wrong patient population                     | 1           |
| 1402         | The awareness of late-life depression in clinical practice                                                                                                                  | Ou, WT         | 2017 | Journal of Internal Medicine of Taiwan         | Wrong setting                                | 1           |
| 1790         | Psychological status under stress in soldiers at different posts and of different service age                                                                               | Li, JF         | 2005 | Chinese Journal of Clinical Rehabilitation     | Wrong patient population                     | 1           |
| 1830         | Coping with the threat of severe acute respiratory syndrome: Role of threat appraisals and coping responses in health behaviors                                             | Lee-Baggley, D | 2004 | Asian Journal of Social Psychology             | Beyond 5 defined regions                     | 1           |
| 1945         | The psychological burden of bioterrorism                                                                                                                                    | Hall, MJ       | 2004 | Journal of Aggression, Maltreatment and Trau   | Primary data not SARS related                | 1           |
| 2015         | Outcomes up to 5 years after severe, acute respiratory failure                                                                                                              | Garland, A     | 2004 | Chest                                          | Primary data not SARS related                | 1           |
| 2899         | One-year outcomes in survivors of the acute respiratory distress syndrome                                                                                                   | Herridge, MS   | 2003 | New England Journal of Medicine                | Not about SARS                               | 1           |
| 3035         | Well-being in informal caregivers of survivors of acute respiratory distress syndrome                                                                                       | Cameron, JI    | 2006 | Critical Care Medicine                         | Wrong patient population                     | 1           |
| 619          | The SARS-associated stigma of SARS victims in the post-SARS era of Hong Kong                                                                                                | Siu, JY        | 2008 | Qual Health Res                                | Qualitative                                  | 2           |
| 36           | Validation of Impact of Events Scale in nurses under threat of contagion by severe acute respiratory syndrome                                                               | Chen, CS       | 2005 | Psychiatry and Clinical Neurosciences          | validation of scale                          | 2           |
| 131          | Comparison of anxious level of medical students from different resources during severe acute respiratory syndrome epidemic period                                           | Zuo, Q         | 2005 | Chinese Journal of Clinical Rehabilitation     | Lack clear link between morbidities and SARS | 2           |
| 160          | Reasons for a high score on compulsory symptom in psychological survey among college students                                                                               | Zheng, LJ      | 2005 | Chinese Journal of Clinical Rehabilitation     | Lack clear link between morbidities and SARS | 2           |
| 196          | The impact of epidemic outbreak: the case of severe acute respiratory syndrome (SARS) and suicide among older adults in Hong Kong                                           | Yip, PS        | 2010 | Crisis                                         | qualitative                                  | 2           |
| 252          | Psychological Stress of Nurses in SARS Wards                                                                                                                                | Liu, XH        | 2003 | Chinese Mental Health Journal                  | Lack clear link between morbidities and SARS | 2           |
| 324          | The cycle fear: A qualitative study of SARS and its impacts on kindergarten parents one year after the outbreak                                                             | Wong, WCW      | 2007 | Hong Kong Practitioner                         | qualitative                                  | 2           |
| 477          | Psychosocial Aspects in Three Universities during SARS Epidemic in Beijing                                                                                                  | Huang, YQ      | 2003 | Chinese Mental Health Journal                  | Lack clear link between morbidities and SARS | 2           |
| 479          | Effect of the emergency of severe acute respiratory syndrome on the psychological health in college students                                                                | Yuan, X        | 2004 | Chinese Journal of Clinical Rehabilitation     | Lack clear link between morbidities and SARS | 2           |
| 496          | Mental survey in female students from a medical college of Guangxi during the epidemic period of severe acute respiratory syndrome                                          | Tang, QS       | 2005 | Chinese Journal of Clinical Rehabilitation     | Lack clear link between morbidities and SARS | 2           |
| 627          | Coping with future epidemics: Tai chi practice as an overcoming strategy used by survivors of severe acute respiratory syndrome (SARS) in post-SARS Hong Kong               | Siu, JY        | 2016 | Health Expect                                  | qualitative                                  | 2           |
| 640          | Psychosocial and coping responses within the community health care setting towards a national outbreak of an infectious disease                                             | Sim, K         | 2010 | Journal of Psychosomatic Research              | qualitative                                  | 2           |
| 757          | Short communication: Evaluation of the emotional status of patients on a waiting list for thoracic surgery during the outbreak of Severe Acute Respiratory Syndrome (SARS)  | Wan, JY        | 2004 | Stress and Health: Journal of the Internationa | Lack clear link between morbidities and SARS | 2           |
| 857          | An exploratory study of nurses suffering from severe acute respiratory syndrome (SARS)                                                                                      | Mok, E         | 2005 | Int J Nurs Pract                               | qualitative                                  | 2           |
| 1076         | Severe acute respiratory syndrome-related psychiatric and posttraumatic morbidities and coping responses in medical staff within a primary health care setting in Singapore | Sim, K         | 2004 | The Journal of Clinical Psychiatry             | Wrong study design                           | 2           |
| 1091         | Trait-State Anxiety and Attributions to Health States in a Stressful Setting                                                                                                | Wang, SZ       | 2004 | Chinese Mental Health Journal                  | Lack clear link between morbidities and SARS | 2           |
| 1099         | Surviving a life-threatening crisis: Taiwan's nurse leaders' reflections and difficulties fighting the SARS epidemic                                                        | Shih, FJ       | 2009 | Journal of Clinical Nursing                    | Wrong study design                           | 2           |
| 1102         | Dying and caring on the edge: Taiwan's surviving nurses' reflections on taking care of patients with severe acute respiratory syndrome                                      | Shih, FJ       | 2007 | Appl Nurs Res                                  | Wrong study design                           | 2           |
| 1114         | Post-traumatic stress disorder checklist following SARS                                                                                                                     | Shi, TY        | 2005 | Chinese Journal of Clinical Rehabilitation     | validation of PTSD instruments from conveni  | 2           |
| 1230         | The psychosocial effects of being quarantined following exposure to SARS: a qualitative study of Toronto health care workers                                                | Robertson, E   | 2004 | Can J Psychiatry                               | Wrong study design                           | 2           |
| 1250         | Relationship between mental status during severe acute respiratory syndrome and type of temperament in students of medical college                                          | Ren, ZM        | 2005 | Chinese Journal of Clinical Rehabilitation     | Lack clear link between morbidities and SARS | 2           |
| 1276         | The impact of severe acute respiratory syndrome on medical house staff: a qualitative study                                                                                 | Rambadini, G   | 2005 | J Gen Intern Med                               | Wrong study design                           | 2           |
| 1435         | If schools are closed, who will watch our kids? Family caregiving and other sources of role conflict among nurses during large-scale outbreaks                              | O'Sullivan, TL | 2009 | Prehosp Disaster Med                           | Wrong study design                           | 2           |
| 1538         | Bowly and Robertson revisited: the impact of isolation on hospitalized children during SARS                                                                                 | Koller, DF     | 2006 | J Dev Behav Pediatr                            | Wrong study design                           | 2           |
| 1539         | When family-centered care is challenged by infectious disease: pediatric health care delivery during the SARS outbreaks                                                     | Koller, DF     | 2006 | Qual Health Res                                | Wrong study design                           | 2           |
| 1583         | The psychological impact of SARS on health care providers                                                                                                                   | Khee, KS       | 2004 | Critical Care and Shock                        | Wrong study design                           | 2           |
| 1678         | Correlation of self-defensive styles of isolated population and their cognition to risk with mental health                                                                  | Hu, SF         | 2005 | Chinese Journal of Clinical Rehabilitation     | Lack clear link between morbidities and SARS | 2           |
| 1891         | People's Attitudes and Emotions under Epidemic of SARS                                                                                                                      | Li, H          | 2003 | Chinese Mental Health Journal                  | Wrong study design                           | 2           |
| 1894         | The SARS crisis: reflections of Hong Kong nurses                                                                                                                            | Holroyd, E     | 2008 | Int Nurs Rev                                   | Wrong study design                           | 2           |
| 1921         | The Socio-Psychological Effects of Killing Masked Civet in the Prevention of SARS                                                                                           | He, YQ         | 2005 | Chinese Mental Health Journal                  | Wrong intervention                           | 2           |
| 2037         | Relationship of Mental Health to Coping Strategies Associated with SARS' Stress in College Students                                                                         | Xu, FM         | 2004 | Chinese Journal of Clinical Psychology         | Wrong study design                           | 2           |
| 2043         | Mental stress and crisis intervention in the patients with SARS and the people related                                                                                      | Cong, Z        | 2003 | Journal of Peking University, Health sciences  | Wrong study design                           | 2           |
| 2223         | Ethical dilemmas in caring for patients with SARS                                                                                                                           | Chiang, HH     | 2006 | Hu li za zhi The journal of nursing            | Wrong study design                           | 2           |
| 2489         | New mothers' experiences of social disruption and isolation during the severe acute respiratory syndrome outbreak in Hong Kong                                              | Dodgson, JE    | 2010 | Nursing & Health Sciences                      | Wrong study design                           | 2           |
| 2733         | 感業SARS醫事人員之內心感受                                                                                                                                                             | 謝佑珊            | 2004 | Unpublished thesis                             | Wrong study design                           | 2           |
| 2736         | 以公共衛生觀點探討護理人員經驗SARS的復原歷程                                                                                                                                                    | 紀滋兒            | 2004 | Unpublished thesis                             | Wrong study design                           | 2           |
| 2743         | 醫務社會工作者面對嚴重急性呼吸道症候群(SARS)疫情壓力因應之研究-以臺大醫院為例                                                                                                                                  | 左祖順            | 2004 | Unpublished thesis                             | Wrong study design                           | 2           |
| 2869         | 照顧SARS病患護理人員的壓力及其因應行為之初探                                                                                                                                                    | 潘雪幸            | 2003 | 臺灣腎臟護理學會雜誌                                     | Wrong study design                           | 2           |
| 2934         | The impact of the SARS outbreak on nurses in Hong Kong: six months after                                                                                                    | Chung, CK      | 2004 | HKU Theses Online (HKUTO)                      | Wrong study design                           | 2           |
| 2935         | Taking care of pediatric SARS patient in isolation ward: a phenomenological view                                                                                            | Cheung, MY     | 2004 | HKU Theses Online (HKUTO)                      | Wrong study design                           | 2           |
| 2936         | The impact of SARS on elderly people in Hong Kong                                                                                                                           | Lau, MMC       | 2004 | HKU Theses Online (HKUTO)                      | Wrong study design                           | 2           |
| 2965         | SARS: pregnant women's fears and perceptions                                                                                                                                | Ng, J          | 2004 | Br. J. Midwifery                               | qualitative                                  | 2           |
| 2970         | Psychosocial impact of SARS [2]                                                                                                                                             | Tsang, HWH     | 2004 | Emerging Infectious Diseases                   | Wrong study design                           | 2           |
| 2981         | Survey on SARS Related Difficulties in Work and Social Lives in Hong Kong                                                                                                   |                | 2003 | Equal Opportunities Commission                 | Wrong study design                           | 2           |
| 3033         | A report of 4 cases of severe acute respiratory syndrome patients with suicidal tendency                                                                                    | Du, L          | 2003 | Di'er J unyi Daxue Xue bao                     | Wrong study design                           | 2           |
| 46           | Nurses' perceptions of severe acute respiratory syndrome: Relationship between commitment and intention to leave nursing                                                    | Chang, CS      | 2006 | Journal of Advanced Nursing                    | Wrong outcomes                               | 3           |

|      |                                                                                                                                                                                        |                |      |                                                                                   |                                                 |   |
|------|----------------------------------------------------------------------------------------------------------------------------------------------------------------------------------------|----------------|------|-----------------------------------------------------------------------------------|-------------------------------------------------|---|
| 56   | The impact of work-related risk on nurses during the SARS outbreak in Hong Kong                                                                                                        | Chan, SS       | 2005 | Family & Community Health                                                         | about nonspecific stress only                   | 3 |
| 205  | Age differences in coping and emotional responses toward SARS: A longitudinal study of Hong Kong Chinese                                                                               | Yeung, DYL     | 2007 | Aging & Mental Health                                                             | Lack clear psycho/mental elements               | 3 |
| 320  | How to provide an effective primary health care in fighting against severe acute respiratory syndrome: the experiences of two cities                                                   | Wong, WC       | 2007 | Am J Infect Control                                                               | Lack clear psycho/mental elements               | 3 |
| 322  | How did general practitioners protect themselves, their family, and staff during the SARS epidemic in Hong Kong?                                                                       | Wong, WC       | 2004 | J Epidemiol Community Health                                                      | Lack structured measures                        | 3 |
| 328  | The psychological impact of severe acute respiratory syndrome outbreak on health care workers in emergency departments and how they cope                                               | Wong, TW       | 2005 | Eur J Emerg Med                                                                   | about nonspecific stress only                   | 3 |
| 354  | Psychological responses to the SARS outbreak in health care students in Hong Kong                                                                                                      | Wong, JGWS     | 2004 | Medical Teacher                                                                   | about nonspecific stress only                   | 3 |
| 405  | Caring for those who care: the role of the occupational health nurse in disasters                                                                                                      | Tomczyk, D     | 2008 | Aaohnj                                                                            | Lack clear psycho/mental elements               | 3 |
| 406  | SARS: coping with the impact at a community hospital                                                                                                                                   | Tomliczenko, G | 2005 | Journal of Advanced Nursing                                                       | Lack structured measures                        | 3 |
| 427  | SARS--a perspective from a school of nursing in Hong Kong                                                                                                                              | Thompson, DR   | 2004 | J Clin Nurs                                                                       | Lack clear psycho/mental elements               | 3 |
| 443  | The relational activation of resilience model: How leadership activates resilience in an organizational crisis                                                                         | Teo, WL        | 2017 | Journal of Contingencies and Crisis Management                                    | Lack clear psycho/mental elements               | 3 |
| 461  | Controlled study of posttraumatic stress disorder among patients with severe acute respiratory syndrome and first-line hospital staffs as well as public in prevalent areas            | Zhang, KR      | 2005 | Chinese Journal of Clinical Rehabilitation                                        | Lack structured measures                        | 3 |
| 622  | Qigong practice among chronically ill patients during the SARS outbreak                                                                                                                | Siu, JY        | 2007 | J Clin Nurs                                                                       | Lack clear psycho/mental elements               | 3 |
| 666  | Bits of falling sky and global pandemics: Moral panic and Severe Acute Respiratory Syndrome (SARS)                                                                                     | Muzzatti, SL   | 2005 | Illness, Crisis, & Loss                                                           | Lack clear psycho/mental elements               | 3 |
| 842  | Experiencing SARS: perspectives of the elderly residents and health care professionals in a Hong Kong nursing home                                                                     | Tse, MM        | 2003 | Geriatr Nurs                                                                      | about nonspecific stress only                   | 3 |
| 866  | Behaviour, Cognition and Emotion of the Public in Beijing towards SARS                                                                                                                 | Qian, MY       | 2003 | Chinese Mental Health Journal                                                     | about nonspecific stress only                   | 3 |
| 920  | The immediate psychological and occupational impact of the 2003 SARS outbreak in a teaching hospital                                                                                   | Maunder, R     | 2003 | Cmaj                                                                              | Lack structured measures                        | 3 |
| 954  | Comparative stigma of HIV/AIDS, SARS, and tuberculosis in Hong Kong                                                                                                                    | Mak, WW        | 2006 | Soc Sci Med                                                                       | Lack clear psycho/mental elements               | 3 |
| 957  | Social support and psychological adjustment to SARS: the mediating role of self-care self-efficacy                                                                                     | Mak, WW        | 2009 | Psychol Health                                                                    | Lack structured measures                        | 3 |
| 960  | A comparative study of the stigma associated with infectious diseases (SARS, AIDS, TB)                                                                                                 | Mak, WW        | 2009 | Hong Kong Med J                                                                   | Lack clear psycho/mental elements               | 3 |
| 970  | Relations of SARS-related stressors and coping to Chinese college students' psychological adjustment during the 2003 Beijing SARS epidemic                                             | Main, A        | 2011 | J Couns Psychol                                                                   | Lack clear psycho/mental elements               | 3 |
| 1029 | Tachycardia amongst subjects recovering from severe acute respiratory syndrome (SARS)                                                                                                  | Lau, ST        | 2005 | Int J Cardiol                                                                     | Wrong outcomes                                  | 3 |
| 1107 | The SARS (Severe Acute Respiratory Syndrome) pandemic in Hong Kong: effects on the subjective wellbeing of elderly and younger people                                                  | Lau, AL        | 2008 | Aging Ment Health                                                                 | Lack clear psycho/mental elements               | 3 |
| 1170 | Factors predicting nurses' consideration of leaving their job during the SARS outbreak                                                                                                 | Shiao, JS      | 2007 | Nurs Ethics                                                                       | Wrong outcomes                                  | 3 |
| 1115 | Post-traumatic stress disorder and related factors following the severe acute respiratory syndrome                                                                                     | Shi, T.Y.      | 2005 | Chinese Journal of Clinical Rehabilitation                                        | did not specify cutoff criteria for diagnosis o | 3 |
| 1116 | Quality of life after discharge in patients with severe acute respiratory syndrome                                                                                                     | Shi, L         | 2005 | Chinese Journal of Clinical Rehabilitation                                        | Lack clear psycho/mental elements               | 3 |
| 1118 | Rationality of 17 cities' public perception of SARS and predictive model of psychological behavior                                                                                     | Shi, K         | 2003 | Chinese Science Bulletin                                                          | Lack structured measures                        | 3 |
| 1272 | Godzilla in the corridor: The Ontario SARS crisis in historical perspective                                                                                                            | Rankin, J      | 2006 | Intensive Crit Care Nurs                                                          | about nonspecific stress only                   | 3 |
| 1287 | Crisis prevention and management during SARS outbreak, Singapore                                                                                                                       | Quah, SR       | 2004 | Emerg Infect Dis                                                                  | Lack clear psycho/mental elements               | 3 |
| 1292 | Behavioural, cognitive and emotional responses to SARS: Differences between college students in Beijing and Suzhou                                                                     | Qian, MY       | 2005 | Stress and Health: Journal of the International Association of Applied Psychology | Lack structured measures                        | 3 |
| 1309 | The impact of ER, burnout, and caring for SARS patients on hospital nurses' self-reported compliance with infection control                                                            | Pratt, M.      | 2009 | Canadian Journal of Infection Control                                             | Lack clear psycho/mental elements               | 3 |
| 1334 | Infectious respiratory disease outbreaks and pregnancy: occupational health and safety concerns of Canadian nurses                                                                     | Phillips, KP   | 2011 | Prehosp Disaster                                                                  | Lack clear psycho/mental elements               | 3 |
| 1475 | Outcome of coronavirus-associated severe acute respiratory syndrome using a standard treatment protocol                                                                                | Lau, AC        | 2004 | Respirology                                                                       | Wrong outcomes                                  | 3 |
| 1481 | Sharing the trauma: Guidelines for therapist self-disclosure following a catastrophic event                                                                                            | LaPorte, H     | 2010 | Best Practices in Mental Health: An International Journal                         | Lack clear psycho/mental elements               | 3 |
| 1507 | The lessons of SARS in Hong Kong                                                                                                                                                       | Lai, TS        | 2010 | Clin Med (Lond)                                                                   | Lack structured measures                        | 3 |
| 1628 | The Risk Perceptions of SARS and Socio-Psychological Behaviors of Urban People in China                                                                                                | Shi, K         | 2003 | Acta Psychologica Sinica                                                          | Lack clear psycho/mental elements               | 3 |
| 1643 | A Confirmative Research on Social Support and SARS Stress                                                                                                                              | Tone, HJ       | 2004 | Psychological Science                                                             | Lack clear psycho/mental elements               | 3 |
| 1644 | Long-term sequelae of SARS: physical, neuropsychiatric, and quality-of-life assessment                                                                                                 | Hui, DSC       | 2009 | Hong Kong Medical Journal                                                         | Lack clear psycho/mental elements               | 3 |
| 1665 | Model of SARS Stress and its Character                                                                                                                                                 | Tone, HJ       | 2004 | Acta Psychologica Sinica                                                          | Lack clear psycho/mental elements               | 3 |
| 1685 | Confidence in controlling a SARS outbreak: experiences of public health nurses in managing home quarantine measures in Taiwan                                                          | Hsu, CC        | 2006 | Am J Infect Control                                                               | Lack clear psycho/mental elements               | 3 |
| 1726 | Mood state of netizens in association with their coping style and social support under the stress of severe acute respiratory syndrome                                                 | Lin, XY        | 2005 | Chinese Journal of Clinical Rehabilitation                                        | Lack clear psycho/mental elements               | 3 |
| 1728 | The Mediating Effects of Coping Ways on Quality of Life of Persons Recovered from SARS                                                                                                 | Shi, L         | 2004 | Chinese Journal of Clinical Psychology                                            | Lack clear psycho/mental elements               | 3 |
| 1736 | Lessons learned from the anti-SARS quarantine experience in a hospital-based fever screening station in Taiwan                                                                         | Lin, EC        | 2010 | Am J Infect Control                                                               | Lack clear psycho/mental elements               | 3 |
| 1777 | An investigation of response to SARS stress and mental health of nurse students during SARS prevalent period                                                                           | Li, XL         | 2005 | Chinese Journal of Clinical Rehabilitation                                        | Lack structured measures                        | 3 |
| 1795 | Long-term sequelae of SARS in children                                                                                                                                                 | Li, AM         | 2004 | Paediatr Respir Rev                                                               | Lack structured measures                        | 3 |
| 1798 | Community Reactions to the SARS Crisis in Hong Kong: Analysis of a Time-Limited Counseling Hotline                                                                                     | Leung, TTF     | 2005 | Journal of Human Behavior in the Social Environ                                   | No standardised measures                        | 3 |
| 1799 | Repositioning risk in social work education: Reflections arising from the threat of SARS to social work students in Hong Kong during their field practicum                             | Leung, TTF     | 2007 | Social Work Education                                                             | Lack clear psycho/mental elements               | 3 |
| 1804 | A tale of two cities: community psycho-behavioral surveillance and related impact on outbreak control in Hong Kong and Singapore during the severe acute respiratory syndrome epidemic | Leung, GM      | 2004 | Infect Control Hosp Epidemiol                                                     | Lack clear psycho/mental elements               | 3 |
| 1846 | Facing SARS: Psychological impacts on SARS team nurses and psychiatric services in a Taiwan general hospital                                                                           | Lee, SH        | 2005 | General Hospital Psychiatry                                                       | Lack clear psycho/mental elements               | 3 |
| 1848 | The experience of SARS-related stigma at Amoy Gardens                                                                                                                                  | Lee, S         | 2005 | Soc Sci Med                                                                       | Lack clear psycho/mental elements               | 3 |
| 1905 | Fear of severe acute respiratory syndrome (SARS) among health care workers                                                                                                             | Ho, SM         | 2005 | J Consult Clin Psychol                                                            | Lack clear psycho/mental elements               | 3 |
| 1974 | The occupational and psychosocial impact of SARS on academic physicians in three affected hospitals                                                                                    | Grace, SL      | 2005 | Psychosomatics                                                                    | Lack clear psycho/mental elements               | 3 |
| 2012 | Experiences and implications of social workers practicing in a pediatric hospital environment affected by SARS                                                                         | Gearing, RE    | 2007 | Health & Social Work                                                              | Lack clear psycho/mental elements               | 3 |
| 2022 | Flexible coping responses to severe acute respiratory syndrome-related and daily life stressful events                                                                                 | Gan, YQ        | 2004 | Asian Journal of Social Psychology                                                | Lack clear psycho/mental elements               | 3 |
| 2060 | Rapid assessment of a helpdesk service supporting severe acute respiratory syndrome patients and their relatives                                                                       | Chung, JW      | 2004 | Journal of Clinical Nursing                                                       | Lack clear psycho/mental elements               | 3 |
| 2061 | SARS: caring for patients in Hong Kong                                                                                                                                                 | Chung, BP      | 2005 | Journal of Clinical Nursing                                                       | Wrong outcomes                                  | 3 |
| 2065 | Psychometric evaluation of the stress scale of caring for highly infectious disease patients among health care workers - Based on SARS                                                 | Chuang, PY     | 2005 | Taiwan Journal of Public Health                                                   | Lack clear psycho/mental elements               | 3 |
| 2090 | SARS and psychogeriatrics: Perspective and lessons from Hong Kong                                                                                                                      | Chiu, HFK      | 2003 | International Journal of Geriatric Psychiatry                                     | Wrong outcomes                                  | 3 |
| 2156 | The original report of mental assistance hotline for SARS in Beijing                                                                                                                   | Zhong, J       | 2003 | Chinese Mental Health Journal                                                     | Lack clear psycho/mental elements               | 3 |
| 2169 | The Effects of Different Coping Strategy on People's Behavior Habits Under the Stressor of SARS                                                                                        | Wang, JP       | 2004 | Chinese Journal of Clinical Psychology                                            | Lack clear psycho/mental elements               | 3 |
| 2171 | Optimism across cultures: In response to the severe acute respiratory syndrome outbreak                                                                                                | Ji, LJ         | 2004 | Asian Journal of Social Psychology                                                | Lack clear psycho/mental elements               | 3 |

|      |                                                                                                                                                                                          |                   |      |                                                                                                        |                                                          |   |
|------|------------------------------------------------------------------------------------------------------------------------------------------------------------------------------------------|-------------------|------|--------------------------------------------------------------------------------------------------------|----------------------------------------------------------|---|
| 2194 | How infectious disease outbreaks affect community-based primary care physicians: comparing the SARS and H1N1 epidemics                                                                   | Jaakkimäinen, RL  | 2014 | Can Fam Physician                                                                                      | Lack clear psycho/mental elements                        | 3 |
| 2224 | Self-state of nurses in caring for SARS survivors                                                                                                                                        | Chiang, HH        | 2007 | Nursing Ethics                                                                                         | Wrong outcomes                                           | 3 |
| 2235 | Institutional trust as a determinant of anxiety during the SARS crisis in Hong Kong                                                                                                      | Cheung, CK        | 2008 | Social Work in Public Health                                                                           | Lack structured measures                                 | 3 |
| 2253 | Perception of benefits and costs during SARS outbreak: An 18-month prospective study                                                                                                     | Cheng, C          | 2006 | Journal of Consulting and Clinical Psychology                                                          | Lack structured mental health morbidities measures       | 3 |
| 2265 | The impact of the SARS outbreak on an urban emergency department in Taiwan                                                                                                               | Chen, WK          | 2005 | Medical Care                                                                                           | Lack structured measures                                 | 3 |
| 2268 | Post-SARS knowledge sharing and professional commitment in the nursing profession                                                                                                        | Chen, SL          | 2008 | Journal of Clinical Nursing                                                                            | Lack clear psycho/mental elements                        | 3 |
| 2494 | Factors influencing compliance with quarantine in Toronto during the 2003 SARS outbreak                                                                                                  | DiGiovanni, C     | 2004 | Biosecurity and Bioterrorism-BioDefense Strategic                                                      | Wrong outcomes                                           | 3 |
| 2500 | The Singaporean response to the SARS outbreak: knowledge sufficiency versus public trust                                                                                                 | Deurenberg-Yap    | 2005 | Health Promotion International                                                                         | Wrong outcomes                                           | 3 |
| 2508 | Perceived threat, risk perception, and efficacy beliefs related to SARS and other (emerging) infectious diseases: Results of an international survey                                     | deZwart, O        | 2009 | International Journal of Behavioral Medicine                                                           | Wrong outcomes                                           | 3 |
| 2684 | Comparison of the mental health level during severe acute respiratory syndrome between 1041 students of five colleges in Inner Mongolia and national norms                               | Bai, YX           | 2005 | Chinese Journal of Clinical Rehabilitation                                                             | Lack clear psycho/mental elements                        | 3 |
| 2707 | Strategies adopted and lessons learnt during the severe acute respiratory syndrome crisis in Singapore                                                                                   | Tan, BH           | 2005 | Rev Med Virol                                                                                          | Wrong outcomes                                           | 3 |
| 2738 | Job Stress and Coping in Emergency Room Nurses Confronting Severe Acute Respiratory Syndrome Crisis                                                                                      | Yu, WC            | 2004 | Chung Shan Medical Journal                                                                             | about nonspecific stress only                            | 3 |
| 2773 | The Singaporean response to the SARS outbreak: Knowledge sufficiency versus public trust Risk perception and impact of severe acute respiratory syndrome (SARS) on work and p            | Deurenberg-Yap    | 2005 | Health Promotion International                                                                         | Lack clear psycho/mental elements                        | 3 |
| 2807 | SARS治疗一线医护人员心理健康状况调查及危机干预模式构建的研究                                                                                                                                                         | 汪萍                | 2005 | unpublished thesis                                                                                     | Lack structured measures                                 | 3 |
| 2885 | SARS期間臺灣觀光旅館之公司政策、SARS知識與員工心理焦慮之關係研究                                                                                                                                                     | 許順琪               | 2006 | 餐旅暨家政學刊                                                                                                | Lack structured measures                                 | 3 |
| 2895 | Clinical mental state of sufferer of SARS intervention mode and curative effect valuation                                                                                                | Wang, ZQ          | 2003 | Zhongguo Xinli Wensheng Zazhi                                                                          | Lack structured measures                                 | 3 |
| 2900 | The Impact of the SARS Epidemic on the Utilization of Medical Services: SARS and the Fear of SARS                                                                                        | Chang, HJ         | 2004 | American Journal of Public Health                                                                      | Lack clear psycho/mental elements                        | 3 |
| 2907 | SARS疫情對大專生心理影響與預防認知之研究--以美和技術學院為例                                                                                                                                                        | 莊德豐               | 2007 | 美和技術學院學報                                                                                               | Lack structured measures                                 | 3 |
| 2912 | 急診病患接受SARS防疫隔離看診的心理衝擊與照護滿意度                                                                                                                                                              | 彭逸祺               | 2004 | 臺灣急診醫學會醫誌                                                                                              | Lack clear psycho/mental elements                        | 3 |
| 3010 | The mental health status of medical workers in SARS wards and outpatient departments in Beijing                                                                                          | Yang, X           | 2004 | Chin J Health Educ                                                                                     | Lack structured measures                                 | 3 |
| 3021 | The public's response to severe acute respiratory syndrome in Toronto and the United States                                                                                              | Blendon, RJ       | 2004 | Clinical Infectious Diseases                                                                           | Lack clear psycho/mental elements                        | 3 |
| 275  | Relation between social support and mental health of patients with severe acute respiratory syndrome                                                                                     | Xiao, R           | 2004 | Chinese Journal of Clinical Rehabilitation                                                             | Validation of the instrument cannot be found             | 3 |
| 2719 | 防治传染性非典型肺炎过程中保健医务人员心理状态调查                                                                                                                                                                | 张晓红               | 2003 | 中国临床康复                                                                                                 | doubtful design and validity of the questionnaire        | 3 |
| 3006 | Behaviour, Cognition and Emotion of the Public in Beijing towards SARS [Behaviour, Cognition and Emotion of the Public in Beijing towards SARS]                                          | Qian, MY          | 2003 | Chinese Mental Health Journal                                                                          | doubtful design and validity of the questionnaire        | 3 |
| 3012 | Study of the effects of SARS on the mental health of the medical staff of a fever clinic in a military hospital [Chinese]                                                                | Liu, J            | 2004 | Nanfang J Nurs                                                                                         | doubtful design and validity of the questionnaire        | 3 |
| 2940 | Longitudinal changes in community psycho-behavioural responses and impact on outbreak control during severe acute respiratory syndrome (SARS) epidemic in Hong Kong                      | Fong, HC          | 2004 | HKU Theses Online (HKUTO)                                                                              | likely used a subset of data from Leung et al.           | 4 |
| 274  | Investigation on psychological condition of patients with severe acute respiratory syndrome                                                                                              | Xiao, R           | 2004 | Chinese Journal of Clinical Rehabilitation                                                             | Redundant content in another full paper                  | 4 |
| 301  | Posttraumatic stress, anxiety, and depression in survivors of severe acute respiratory syndrome (SARS)                                                                                   | Wu, KK            | 2005 | J Trauma Stress                                                                                        | Redundant content in another full paper                  | 4 |
| 369  | Mental health impact of severe acute respiratory syndrome: a prospective study                                                                                                           | Wing, YK          | 2012 | Hong Kong Med J                                                                                        | Redundant content in another full paper                  | 4 |
| 698  | Chronic fatigue, pain, depression and disordered sleep in chronic HIV and post SARS patients                                                                                             | Moldofsky, H      | 2012 | 26th Annual Meeting of the Associated Professional Societies of the American Psychological Association | Redundant content in another full paper                  | 4 |
| 855  | Fatigue, muscular symptoms and disordered sleep in chronic post SARS                                                                                                                     | Moldofsky, H      | 2005 | Sleep                                                                                                  | Redundant content in another full paper                  | 4 |
| 1006 | The Mental Health of Hospital Workers Dealing with Severe Acute Respiratory Syndrome                                                                                                     | Lu, YC            | 2006 | Psychotherapy and Psychosomatics                                                                       | data overlapped with other included studies              | 4 |
| 1040 | SARS-related perceptions in Hong Kong                                                                                                                                                    | Lau, JTF          | 2005 | Emerging Infectious Diseases                                                                           | Redundant content in another full paper                  | 4 |
| 1125 | The effects of disease severity, use of corticosteroids and social factors on neuropsychiatric complaints in severe acute respiratory syndrome (SARS) patients at acute and convalescent | Sheng, B          | 2005 | Eur Psychiatry                                                                                         | Data overlapped with other included studies              | 4 |
| 1652 | The long-term impact of severe acute respiratory syndrome (SARS) on pulmonary function, exercise capacity, and quality of life in a cohort of survivors                                  | Hui, DS           | 2005 | Chest                                                                                                  | Redundant content in another full paper                  | 4 |
| 1653 | Impact of severe acute respiratory syndrome (SARS) on pulmonary function, functional capacity and quality of life in a cohort of survivors                                               | Hui, DS           | 2005 | Thorax                                                                                                 | Redundant content in another full paper                  | 4 |
| 1809 | The impact of community psychological responses on outbreak control for severe acute respiratory syndrome in Hong Kong                                                                   | Leung, GM         | 2003 | J Epidemiol Community Health                                                                           | redundant content in another full paper                  | 4 |
| 2745 | 嚴重急性呼吸道症候群醫療照護者之心理健康                                                                                                                                                                     | 呂宜靜               | 2006 | 高雄醫學大學行為科學研究所學位論文                                                                                      | Redundant content in another full paper                  | 4 |
| 3011 | The psychological impact of an infectious disease outbreak: Lessons from SARS in Beijing                                                                                                 | Wu, P             | 2007 | American Public Health Association 135th Annual Meeting                                                | Redundant content in another full paper                  | 4 |
| 1333 | Coping responses of emergency physicians and nurses to the 2003 severe acute respiratory syndrome outbreak                                                                               | Phua, D           | 2005 | Acad Emerg Med                                                                                         | same data and result as #435 without additional analysis | 4 |
| 938  | The relevance of psychosocial variables and working conditions in predicting nurses' coping strategies during the SARS crisis: an online questionnaire survey                            | Marjanovic, Z     | 2007 | Int J Nurs Stud                                                                                        | data overlapped with other included studies              | 4 |
| 278  | Outcomes of SARS survivors in China: not only physical and psychiatric co-morbidities                                                                                                    | Xiang, YT         | 2014 | East Asian Arch Psychiatry                                                                             | Not an original research or review                       | 5 |
| 572  | SARS control and psychological effects of quarantine, Toronto, Canada - In response                                                                                                      | Styra, R          | 2005 | Emerging Infectious Diseases                                                                           | Not an original research or review                       | 5 |
| 800  | Combating stigma and fear: Applying psychosocial lessons learned from the HIV epidemic and SARS to the current Ebola crisis                                                              | Vega, MY          | 2016 | The psychosocial aspects of a deadly epidemic: Not an original research or review                      | Not an original research or review                       | 5 |
| 854  | Psychosocial impact of SARS                                                                                                                                                              | Tsang, HW         | 2004 | Emerg Infect Dis                                                                                       | Not an original research or review                       | 5 |
| 898  | Psychological morbidity related to the SARS outbreak in Hong Kong                                                                                                                        | McAlonan, GM      | 2005 | Psychol Med                                                                                            | Not an original research or review                       | 5 |
| 909  | Applying the lessons of SARS to pandemic influenza: an evidence-based approach to mitigating the stress experienced by healthcare workers                                                | Mauder, R         | 2008 | Can J Public Health                                                                                    | Not an original research or review                       | 5 |
| 922  | The experience of the 2003 SARS outbreak as a traumatic stress among frontline healthcare workers in Toronto: lessons learned                                                            | Mauder, R         | 2004 | Philos Trans R Soc Lond B Biol Sc                                                                      | Not an original research or review                       | 5 |
| 923  | Stress, coping and lessons learned from the SARS outbreak                                                                                                                                | Mauder, R         | 2003 | Hosp Q                                                                                                 | Not an original research or review                       | 5 |
| 1073 | The psychological impact of SARS: a matter of heart and mind                                                                                                                             | Sim, K            | 2004 | Cmaj                                                                                                   | Not an original research or review                       | 5 |
| 1210 | Severe acute respiratory syndrome: "Unmasking our emotional vulnerability as healthcare providers"                                                                                       | Ruppert-Garcia, M | 2004 | Critical Care and Shock                                                                                | Not an original research or review                       | 5 |
| 1968 | Professional Efficacy and Social Support in Nurses During the SARS Crisis in Canada and China                                                                                            | Greenglass, ER    | 2011 | New Directions in Organizational Psychology                                                            | Not an original research or review                       | 5 |
| 2016 | Psychological Impact on SARS Survivors: Critical Review of the English Language Literature                                                                                               | Gardner, PJ       | 2015 | Canadian Psychology-Psychologie Canadienne                                                             | Not an original research or review                       | 5 |
| 2249 | Psychological intervention with sufferers from severe acute respiratory syndrome (SARS): Lessons learnt from empirical findings                                                          | Cheng, SK         | 2005 | Clinical Psychology & Psychotherapy                                                                    | Not an original research or review                       | 5 |
| 2485 | Community mobilisation and empowerment for combating a pandemic                                                                                                                          | Dong, WZ          | 2010 | Journal of Epidemiology and Community Health                                                           | Not an original research or review                       | 5 |
| 2512 | Work-related critical incidents in hospital-based health care providers and the risk of post-traumatic stress symptoms, anxiety, and depression: A meta-analysis                         | deBoer, J         | 2011 | Social Science & Medicine                                                                              | Not an original research or review                       | 5 |
| 2716 | The yellow peril revisited: the impact of SARS on Chinese and Southeast Asian Communities                                                                                                | Leung, C          | 2008 | Resources for Feminist Research 2008 Spring                                                            | Not an original research or review                       | 5 |
| 2752 | 灾难时期的社区心理干预——中国SARS疫情发生后的社区精神卫生问题                                                                                                                                                        | 黄悦勤               | 2003 | 中华全科医师杂志                                                                                               | Not an original research or review                       | 5 |
| 2801 | 突发事件时实施群体心理危机干预的效果研究                                                                                                                                                                     | 金宁宁               | 2005 | unpublished thesis                                                                                     | Not an original research or review                       | 5 |
| 2991 | Affirming flames: Stress management for nurses under SARS outbreak                                                                                                                       | Chan, C           | 2003 | The Hong Kong Nursing Journal                                                                          | Not an original research or review                       | 5 |

|      |                                                                                                                                                                        |             |      |                                               |                                               |   |
|------|------------------------------------------------------------------------------------------------------------------------------------------------------------------------|-------------|------|-----------------------------------------------|-----------------------------------------------|---|
| 3015 | To beparanoid is thestandard?Panic responses to SARS outbreak in theHong KongSpecial Administrative Region                                                             | Cheng, C    | 2004 | Asian Perspectiv                              | Not an original research or review            | 5 |
| 3026 | Severeacuterespiratorysyndrome(SARS): A brief review with exploration of theoutcomes, prognostic factors and sequelae                                                  | Chan JW     | 2005 | Current Respiratory Medicine Reviews          | Not an original research or review            | 5 |
| 3042 | Mental stress and crisis intervention in thepatients with SARS and thepeople related                                                                                   | Cong, Z     | 2003 | Journal of Peking University, Health sciences | Not an original research or review            | 5 |
| 469  | Psychological crisis intervention model in Xiaotanshan Hospital of PLA                                                                                                 | Wang, ZQ    | 2003 | Chinese Mental Health Journal                 | confusing data                                | 6 |
| 559  | Psychological analysis for the medical staff suffering from severe acute respiratory syndrome                                                                          | Sun, H      | 7609 | Chinese Journal of Clinical Rehabilitation    | Lack key information                          | 6 |
| 869  | Predictive factors of psychological disorder development during recovery following SARS outbreak                                                                       | Mihashi, M. | 2009 | Health Psychol                                | a mix of patients and non-patients, not defin | 6 |
| 1789 | Observation of curative effect of mental crisis comprehensive in 669 patients with severe acute respiratory syndrome                                                   | Li, JM      | 2006 | Chinese Journal of Clinical Rehabilitation    | Inconsistent data                             | 6 |
| 2295 | Does social capital matter when medical professionals encounter the SARS crisis in a hospital setting                                                                  | Chang, KH   | 2006 | Health Care Management Review                 | outcome measure questionable validity         | 6 |
| 2451 | Investigation to psychological status of the students in the medical observing area of severe acute respiratory syndrome in Sichuan University                         | Fang, L     | 2004 | Chinese Journal of Clinical Rehabilitation    | Inconsistent figures                          | 6 |
| 2721 | SARS患者与抗SARS医务人员心理健康对比分析                                                                                                                                               | 王发强         | 2003 | 中国心理卫生杂志                                      | No specification on when the measurement v    | 6 |
| 2746 | 護理人員對SARS衝擊之身心健康:三年預後研究                                                                                                                                                | 凌美貝         | 2007 | 義守大學管理研究所碩士班                                  | doubtful validity of data                     | 6 |
| 2815 | SARS患者PTSD相关因素分析及追踪研究                                                                                                                                                  | 孙燕          | 2005 | 山西医科大学 硕士研究生毕业论文                              | Mixing SARS and suspected SARS patient in on  | 6 |
| 265  | SCL-90 Results of Medical Staffs treating SARS                                                                                                                         | Xin, Y      | 2003 | Chinese Mental Health Journal                 | data inconsistency                            | 6 |
| 266  | The 'Typhoon Eye Effect': Determinants of distress during the SARS epidemic                                                                                            | Xie, XF     | 2011 | Journal of Risk Research                      | data of mental health measures cannot be ext  | 6 |
| 2602 | The psychological impact of quarantine and how to reduce it: rapid review of the evidence                                                                              | Brook, S    | 2020 | Lancet                                        | Not primary study                             | 5 |
| 2603 | A Systematic, Thematic Review of Social and Occupational Factors Associated With Psychological Outcomes in Health care Employees During an Infectious Disease Outbreak | Brook, S    | 2018 | Journal of Occupational and Environmental H   | Not primary study                             | 5 |
| 107  | Survey of stress reactions among health care workers involved with the SARS outbreak                                                                                   | Bai, YX     | 2004 | Psychiatric Services                          | Non-validated instrument                      | 3 |

#### Codingscheme of reasons of exclusion

|                                                         |   |
|---------------------------------------------------------|---|
| Wrong study population                                  | 1 |
| Wrong study design                                      | 2 |
| Lack standardised measures of mental health morbidities | 3 |
| Data overlapped with other included studies             | 4 |
| Not primary research                                    | 5 |
| Data not extractible                                    | 6 |
